# Supplementary material
Source: PubMed Central journal article supplement (PMC6429949)
Supplement: NIHMS951070-supplement-1.pdf [file NIHMS951070-supplement-1.pdf]

## Supplemental Material

### Time trends and developmental patterns of polybrominated diphenyl ether concentrations over a 15-year period between 1998 and 2013

Whitney J. Cowell, Andreas Sjödin, Richard Jones, Ya Wang, Shuang Wang, Julie B. Herbstman

#### Table of Contents

**Supplemental Material, Table S1.** Within congener correlations of PBDE concentrations from birth through age 9 years.

**Supplemental Material, Table S2.** Between congener correlations of PBDE concentrations from birth through age 9 years.

**Supplemental Material, Table S3.** Criteria for evaluating trajectory fit.

**Supplemental Material, Table S4.** Age-specific comparisons of infant and child PBDE concentrations across several U.S. based studies.

**Supplemental Material, Figure S5.** Age-specific comparisons of infant and child PBDE concentrations across several U.S. based studies.

**Table S1.** Within congener Spearman correlation coefficients (p-values) between plasma PBDE concentrations measured between birth and age 9 years.

|                | Birth        | Age 2        | Age 3        | Age 5        | Age 7        | Age 9 |
|----------------|--------------|--------------|--------------|--------------|--------------|-------|
| <b>BDE-47</b>  |              |              |              |              |              |       |
| Birth          | 1.00         |              |              |              |              |       |
| Age 2          | -0.03 (0.82) | 1.00         |              |              |              |       |
| Age 3          | 0.09 (0.36)  | 0.79 (<0.01) | 1.00         |              |              |       |
| Age 5          | 0.35 (0.02)  | 0.80 (<0.01) | 0.77 (0.07)  | 1.00         |              |       |
| Age 7          | 0.17 (0.02)  | 0.33 (0.04)  | 0.33 (<0.01) | 0.61 (<0.01) | 1.00         |       |
| Age 9          | 0.12 (0.13)  | 0.39 (0.01)  | 0.15 (0.38)  | 0.31 (0.07)  | 0.80 (<0.01) | 1.00  |
| <b>BDE-99</b>  |              |              |              |              |              |       |
| Birth          | 1.00         |              |              |              |              |       |
| Age 2          | 0.04 (0.78)  | 1.00         |              |              |              |       |
| Age 3          | 0.09 (0.36)  | 0.83 (<0.01) | 1.00         |              |              |       |
| Age 5          | 0.32 (0.04)  | 0.63 (0.02)  | 0.49 (0.33)  | 1.00         |              |       |
| Age 7          | 0.13 (0.06)  | 0.36 (0.04)  | 0.41 (<0.01) | 0.62 (<0.01) | 1.00         |       |
| Age 9          | 0.10 (0.20)  | 0.36 (0.06)  | 0.35 (0.06)  | 0.24 (0.16)  | 0.77 (<0.01) | 1.00  |
| <b>BDE-100</b> |              |              |              |              |              |       |
| Birth          | 1.00         |              |              |              |              |       |
| Age 2          | 0.21 (0.13)  | 1.00         |              |              |              |       |
| Age 3          | 0.22 (0.02)  | 0.89 (<0.01) | 1.00         |              |              |       |
| Age 5          | 0.18 (0.26)  | 0.82 (<0.01) | 0.83 (0.04)  | 1.00         |              |       |
| Age 7          | 0.13 (0.07)  | 0.42 (<0.01) | 0.36 (<0.01) | 0.72 (<0.01) | 1.00         |       |
| Age 9          | 0.10 (0.20)  | 0.45 (<0.01) | 0.31 (0.07)  | 0.36 (0.03)  | 0.86 (<0.01) | 1.00  |
| <b>BDE-153</b> |              |              |              |              |              |       |
| Birth          | 1.00         |              |              |              |              |       |
| Age 2          | 0.26 (0.05)  | 1.00         |              |              |              |       |
| Age 3          | 0.12 (0.22)  | 0.89 (<0.01) | 1.00         |              |              |       |
| Age 5          | 0.40 (<0.01) | 0.84 (<0.01) | 0.71 (0.11)  | 1.00         |              |       |
| Age 7          | 0.10 (0.14)  | 0.70 (<0.01) | 0.63 (<0.01) | 0.87 (<0.01) | 1.00         |       |
| Age 9          | 0.07 (0.39)  | 0.82 (<0.01) | 0.67 (<0.01) | 0.89 (<0.01) | 0.93 (<0.01) | 1.00  |

| <b>Table S2.</b> Between congener Spearman correlation coefficients (p-values) for plasma PBDE concentrations measured repeatedly between birth and age 9 years. |              |              |              |         |
|------------------------------------------------------------------------------------------------------------------------------------------------------------------|--------------|--------------|--------------|---------|
| Birth (n=327)                                                                                                                                                    | BDE-47       | BDE-99       | BDE-100      | BDE-153 |
| BDE-47                                                                                                                                                           | 1.00         |              |              |         |
| BDE-99                                                                                                                                                           | 0.83 (<0.01) | 1.00         |              |         |
| BDE-100                                                                                                                                                          | 0.76 (<0.01) | 0.79 (<0.01) | 1.00         |         |
| BDE-153                                                                                                                                                          | 0.47 (<0.01) | 0.50 (<0.01) | 0.66 (<0.01) | 1.00    |
| <b>Age 2 (n=56)</b>                                                                                                                                              |              |              |              |         |
| BDE-47                                                                                                                                                           | 1.00         |              |              |         |
| BDE-99                                                                                                                                                           | 0.94 (<0.01) | 1.00         |              |         |
| BDE-100                                                                                                                                                          | 0.93 (<0.01) | 0.92 (<0.01) | 1.00         |         |
| BDE-153                                                                                                                                                          | 0.75 (<0.01) | 0.71 (<0.01) | 0.89 (<0.01) | 1.00    |
| <b>Age 3 (n=115)</b>                                                                                                                                             |              |              |              |         |
| BDE-47                                                                                                                                                           | 1.00         |              |              |         |
| BDE-99                                                                                                                                                           | 0.96 (<0.01) | 1.00         |              |         |
| BDE-100                                                                                                                                                          | 0.94 (<0.01) | 0.91 (<0.01) | 1.00         |         |
| BDE-153                                                                                                                                                          | 0.76 (<0.01) | 0.73 (<0.01) | 0.90 (<0.01) | 1.00    |
| <b>Age 5 (n=42)</b>                                                                                                                                              |              |              |              |         |
| BDE-47                                                                                                                                                           | 1.00         |              |              |         |
| BDE-99                                                                                                                                                           | 0.92 (<0.01) | 1.00         |              |         |
| BDE-100                                                                                                                                                          | 0.88 (<0.01) | 0.81 (<0.01) | 1.00         |         |
| BDE-153                                                                                                                                                          | 0.58 (<0.01) | 0.55 (<0.01) | 0.82 (<0.01) | 1.00    |
| <b>Age 7 (n=203)</b>                                                                                                                                             |              |              |              |         |
| BDE-47                                                                                                                                                           | 1.00         |              |              |         |
| BDE-99                                                                                                                                                           | 0.93 (<0.01) | 1.00         |              |         |
| BDE-100                                                                                                                                                          | 0.92 (<0.01) | 0.90 (<0.01) | 1.00         |         |
| BDE-153                                                                                                                                                          | 0.49 (<0.01) | 0.51 (<0.01) | 0.67 (<0.01) | 1.00    |
| <b>Age 9 (n=160)</b>                                                                                                                                             |              |              |              |         |
| BDE-47                                                                                                                                                           | 1.00         |              |              |         |
| BDE-99                                                                                                                                                           | 0.94 (<0.01) | 1.00         |              |         |
| BDE-100                                                                                                                                                          | 0.90 (<0.01) | 0.89 (<0.01) | 1.00         |         |
| BDE-153                                                                                                                                                          | 0.46 (<0.01) | 0.43 (<0.01) | 0.65 (<0.01) | 1.00    |

| <b>Table S3.</b> BIC and $2\log_e(B_{10})$ for evaluating LCGA model fit                 |                    |                                                                 |
|------------------------------------------------------------------------------------------|--------------------|-----------------------------------------------------------------|
| <b>Null vs. Alternative model</b><br>[number of trajectories]                            | <b>BIC</b>         | <b><math>2\log_e(B_{10}) \approx 2(\Delta\text{BIC})</math></b> |
| <b>BDE-47</b>                                                                            |                    |                                                                 |
| 2 vs 3                                                                                   | -579.59 vs -571.88 | 15.42                                                           |
| 3 vs <b>4</b>                                                                            | -571.88 vs -558.10 | <b>27.56</b>                                                    |
| 4 vs 5                                                                                   | -558.10 vs -552.37 | 11.46                                                           |
| 5 vs 6                                                                                   | -552.37 vs -554.36 | -3.98                                                           |
| <b>BDE-99</b>                                                                            |                    |                                                                 |
| 2 vs 3                                                                                   | -505.75 vs -496.44 | 18.62                                                           |
| 3 vs <b>4</b>                                                                            | -496.44 vs -483.93 | <b>25.02</b>                                                    |
| 4 vs 5                                                                                   | -483.93 vs -480.39 | 7.08                                                            |
| 5 vs 6                                                                                   | -480.49 vs -475.42 | 10.14                                                           |
| <b>BDE-100</b>                                                                           |                    |                                                                 |
| 2 vs 3                                                                                   | -412.02 vs -399.98 | 24.08                                                           |
| 3 vs <b>4</b>                                                                            | -399.98 vs -363.40 | <b>73.16</b>                                                    |
| 4 vs 5                                                                                   | -363.40 vs -366.19 | -5.58                                                           |
| 5 vs 6                                                                                   | -366.19 vs -362.75 | 6.88                                                            |
| <b>BDE-153</b>                                                                           |                    |                                                                 |
| 2 vs <b>3</b>                                                                            | -223.13 vs -192.72 | <b>60.82</b>                                                    |
| 3 vs 4                                                                                   | -192.72 vs -186.56 | 12.32                                                           |
| 4 vs 5                                                                                   | N/A <sup>a</sup>   |                                                                 |
| 5 vs 6                                                                                   | N/A <sup>a</sup>   |                                                                 |
| $2\log_e(B_{10})$ : interpreted as the degree of evidence favoring the alternative model |                    |                                                                 |
| <sup>a</sup> 5 and 6 group solutions were not possible to estimate for BDE-153           |                    |                                                                 |

**Table S4.** Comparison of geometric mean PBDE concentrations (ng/g lipid) measured in plasma or serum samples by several recent U.S.-based studies.

| Author, year                  | State | PBDE analysis   | N   | Age (yrs) | BDE-47 | BDE-99 | BDE-100 | BDE-153 |
|-------------------------------|-------|-----------------|-----|-----------|--------|--------|---------|---------|
| Cowell (present) <sup>c</sup> | NY    | Longitudinal    | 327 | 0         | 14.1   | 3.7    | 2.9     | 2.6     |
| Mazdai 2003 <sup>a,d</sup>    | IN    | Cross sectional | 12  | 0         | 25.0   | 7.1    | 4.1     | 4.4     |
| Herbstman 2007 <sup>a,c</sup> | MD    | Cross sectional | 297 | 0         | 13.6   | 4.3    | 2.3     | 2.6     |
| Herbstman 2010 <sup>a,c</sup> | NY    | Cross sectional | 201 | 0         | 11.2   | 3.2    | 1.4     | 0.7     |
| Stapleton 2011                | NC    | Cross sectional | 137 | 0         | 16.5   | 4.7    | 4.2     | 5.9     |
| Castorina 2011 <sup>d</sup>   | CA    | Longitudinal    | 416 | 0         | 15.8   | 4.4    | 2.8     | 2.4     |
| Horton 2013 <sup>a,d</sup>    | NY    | Cross sectional | 316 | 0         | 7.9    | 1.6    | 1.7     | 3.0     |
| Vuong 2015 <sup>d</sup>       | OH    | Longitudinal    | 274 | 0         | 20.5   | 4.9    | 4.1     | 5.5     |
| Vuong 2017                    | OH    | Longitudinal    | 76  | 1         | 66.3   | 19.0   | 11.2    | 7.7     |
| Sjodin 2014 <sup>a</sup>      | TX    | Cross sectional | 50  | 0-2       | 15.4   | 3.9    | 2.4     | 3.3     |
| Vuong 2017                    | OH    | Longitudinal    | 61  | 2         | 55.6   | 13.5   | 11.0    | 9.2     |
| Cowell (present)              | NY    | Longitudinal    | 56  | 2         | 37.8   | 18.1   | 7.2     | 4.8     |
| Lunder 2010 <sup>a</sup>      | U.S.  | Cross sectional | 20  | 1-3       | 30.6   | 6.2    | 6.2     | 12.5    |
| Stapleton 2012                | NC    | Cross sectional | 77  | 1-3       | 23.3   | 6.4    | 5.0     | 5.3     |
| Vuong 2017                    | OH    | Longitudinal    | 61  | 3         | 41.1   | 9.3    | 9.1     | 9.3     |
| Cowell (present)              | NY    | Longitudinal    | 115 | 3         | 32.1   | 8.2    | 6.6     | 4.9     |
| Sjodin 2014 <sup>a</sup>      | TX    | Cross sectional | 50  | 2-4       | 26.1   | 7.6    | 6.0     | 6.6     |
| Jacobson 2016                 | GA    | Cross sectional | 80  | 1-5       | 36.2   | 9.7    | 4.0     | 6.0     |
| Rose 2010                     | CA    | Cross sectional | 94  | 2-5       | 61.9   | 25.0   | 21.4    | 20.4    |
| Sjodin 2014 <sup>a</sup>      | TX    | Cross sectional | 50  | 4-6       | 55.7   | 13.3   | 12.0    | 14.1    |
| Wu 2015                       | CA    | Cross sectional | 67  | 2-8       | 61.8   | 13.0   | 12.7    | 16.1    |
| Vuong 2017                    | OH    | Longitudinal    | 127 | 5         | 33.3   | 7.9    | 8.2     | 11.6    |
| Cowell (present)              | NY    | Longitudinal    | 42  | 5         | 25.6   | 6.1    | 6.0     | 6.1     |
| Eskenazi 2013                 | CA    | Longitudinal    | 270 | 7         | 47.3   | 11.1   | 10.7    | 12.2    |
| Cowell (present)              | NY    | Longitudinal    | 203 | 7         | 23.2   | 5.8    | 5.3     | 6.4     |
| Sjodin 2014 <sup>a</sup>      | TX    | Cross sectional | 50  | 6-8       | 28.7   | 6.2    | 8.3     | 12.5    |
| Vuong 2017                    | OH    | Longitudinal    | 173 | 8         | 21.2   | 5.0    | 5.0     | 9.8     |
| Windham 2010                  | CA/OH | Cross sectional | 599 | 6-9       | 42.8   | 9.6    | 9.8     | 13.7    |
| Sagiv 2015                    | CA    | Longitudinal    | 546 | 9         | 35.2   | 7.8    | 7.6     | 9.5     |
| Cowell (present)              | NY    | Longitudinal    | 160 | 9         | 18.1   | 4.4    | 4.0     | 5.5     |
| Sjodin 2014 <sup>a</sup>      | TX    | Cross sectional | 50  | 8-10      | 26.4   | 6.7    | 6.1     | 10.2    |
| Gump 2014 <sup>b</sup>        | NY    | Cross sectional | 43  | 10        | 8.5    | 2.3    | 0.9     | NA      |
| Sjodin 2014                   | TX    | Cross sectional | 50  | 10-13     | 21.2   | 5.4    | 4.6     | 10.9    |

<sup>a</sup>Median, <sup>b</sup>Arithmetic mean, <sup>c</sup>Umbilical cord blood, <sup>d</sup>Maternal blood during pregnancy

**Figure S5.** Age-specific comparison of PBDE concentrations across several U.S.-based studies.

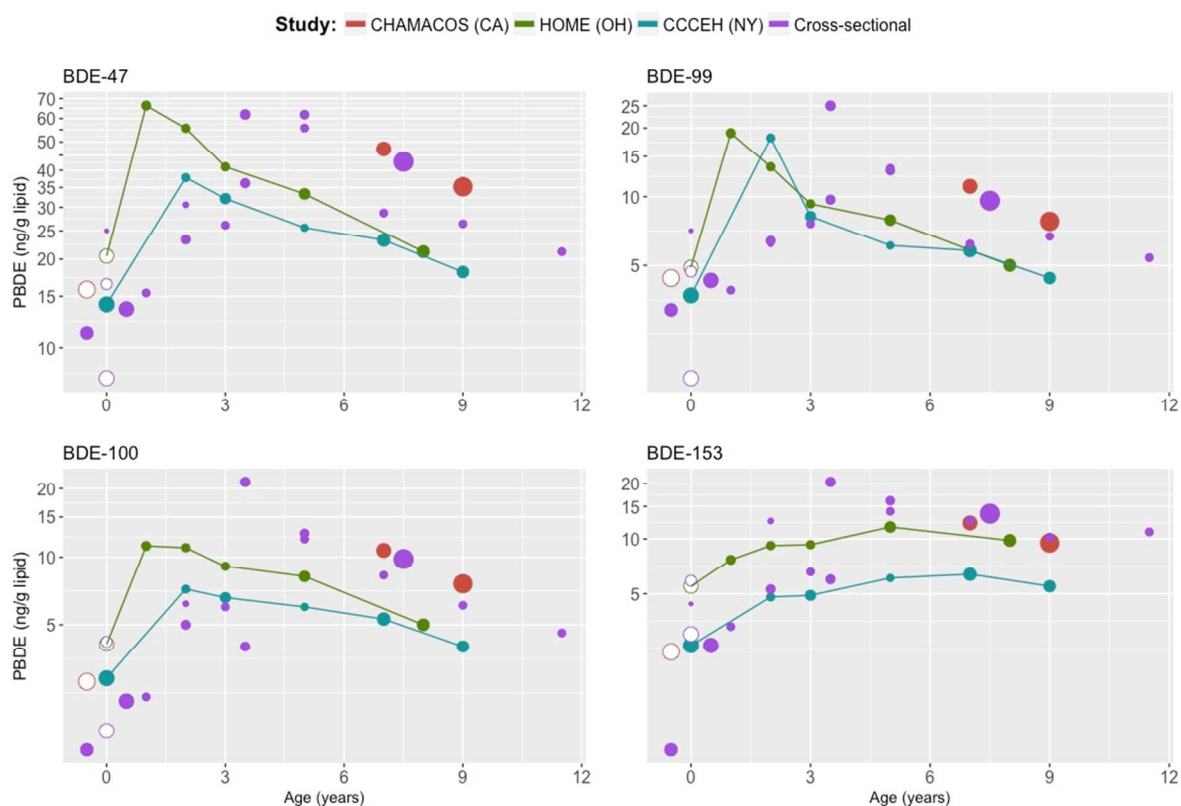

White points outlined in color indicate concentrations measured in maternal (versus cord) blood collected during the prenatal period. The size of each point indicates relative sample size. CHAMACOS: The Center for the Health Assessment of Mothers and Children of Salinas Study (Eskenazi 2013); HOME: Health Outcomes and Measures of the Environment Study (Vuong 2017); CCCEH: Columbia Center for Children’s Environmental Health Mothers and Newborns Cohort. Details and references for cross-sectional studies are provided in the Supplemental Material, Table S4.

## Supplemental Material References

Castorina R, Bradman A, Sjodin A, Fenster L, Jones RS, Harley KG, et al. 2011. Determinants of serum polybrominated diphenyl ether (PBDE) levels among pregnant women in the CHAMACOS cohort. *Environmental Science & Technology* 45(15):6553-60.

Gump, B.B., S. Yun, and K. Kannan. 2014. Polybrominated diphenyl ether (PBDE) exposure in children: possible associations with cardiovascular and psychological functions. *Environmental Research* 132: 244-50.

Eskenazi B, Chevrier J, Rauch SA, Kogut K, Harley KG, Johnson C, et al. 2013. In utero and childhood polybrominated diphenyl ether (PBDE) exposures and neurodevelopment in the CHAMACOS study. *Environmental Health Perspectives* 121:257-262.

Herbstman JB, Sjodin A, Kurzon M, Lederman SA, Jones RS, Rauh V, et al. 2010. Prenatal exposure to PBDEs and neurodevelopment. *Environmental Health Perspectives* 118(5):712-9.

Herbstman JB, Sjodin A, Apelberg BJ, Witter FR, Patterson DG, Halden RU, et al. 2007. Determinants of prenatal exposure to polychlorinated biphenyls (PCBs) and polybrominated diphenyl ethers (PBDEs) in an urban population. *Environmental Health Perspectives* 115(12):1794-800.

Horton MK, Bousleiman S, Jones R, Sjodin A, Liu X, Whyatt R, et al. 2013. Predictors of serum concentrations of polybrominated flame retardants among healthy pregnant women in an urban environment: a cross-sectional study. *Environmental Health* 12:23.

Jacobson, M.H., Barr, D.B., Marcus, M., Muir, A.B., Lyles, R.H., Howards, P. P., et al. 2016. Serum polybrominated diphenyl ether concentrations and thyroid function in young children. *Environmental Research* 149: 222-30.

Lunder, S., Hovander, L., Athanassiadis, I., and Bergman, A. 2010. Significantly higher polybrominated diphenyl ether levels in young U.S. children than in their mothers. *Environmental Science Technology* 44(13): 5256-62.

Mazdai A, Dodder NG, Abernathy MP, Hites RA, Bigsby RM. 2003 Polybrominated diphenyl ethers in maternal and fetal blood samples. *Environmental Health Perspectives* 111(9):1249-52.

Rose, M., Bennett, D.H., Bergman, A., Fangstrom, B., Pessah, I.N., and Hertz-Picciotto, I. 2010. PBDEs in 2-5 year-old children from California and associations with diet and indoor environment. *Environmental Science Technology* 44(7): 2648-53.

Sagiv SK, Kogut K, Gaspar FW, Gunier RB, Harley KG, Parra K, et al. 2015. Prenatal and childhood polybrominated diphenyl ether (pbde) exposure and attention and executive function at 9-12 years of age. *Neurotoxicology and Teratology* 52:151-161

Sjodin, A., Schechter, A., Jones, R., Wong, L., Colacino, J.A., Malik-Bass, N., et al. 2014. Polybrominated diphenyl ethers, 2,2',4,4',5,5'-hexachlorobiphenyl (PCB-153), and p,p'-dichlorodiphenyldichloroethylene (p,p'-dde) concentrations in sera collected in 2009 from Texas children. *Environmental Science Technology* 48(14): 8196-202.

Stapleton HM, Eagle S, Anthopolos R, Wolkin A, Miranda ML. 2011 Associations between polybrominated diphenyl ether (PBDE) flame retardants, phenolic metabolites, and thyroid hormones during pregnancy. *Environmental Health Perspectives* 119(10):1454-9.

Stapleton, H.M., Eagle, S., Sjodin, A., and Webster, T.F. 2012. Serum PBDEs in a North Carolina toddler cohort: associations with handwipes, house dust, and socioeconomic variables. *Environmental Health Perspectives* 120(7): 1049-54.

Vuong AM, Webster GM, Romano ME, Braun JM, Zoeller RT, Hoofnagle AN, et al. 2015. Maternal Polybrominated Diphenyl Ether (PBDE) Exposure and Thyroid Hormones in Maternal and Cord Sera: The HOME Study, Cincinnati, USA. *Environmental Health Perspectives* 123(10):1079-85.

Vuong AM, Braun JM, Yolton K, Xie C, Webster GM, Sjodin A, et al. 2017. Prenatal and postnatal polybrominated diphenyl ether exposure and visual spatial abilities in children. *Environmental Research* 153:83-92

Windham, G.C., Pinney, S.M., Sjodin A, Lum R, Jones, R.S., Needham, L.L., Biro, F.M., et al. 2010. Body burdens of brominated flame retardants and other persistent organohalogenated compounds and their descriptors in U.S. girls. *Environmental Research* 110(3): 251-257.
